# Supplementary material
Source: HighWire-hosted journal article supplement (https://bmjopen.bmj.com/content/9/3/e026590)
Supplement: inline-supplementary-material-3 [file inline-supplementary-material-3.pdf]

1 **Additional file 3.** Selected and exploratory subgroups

|                                | Variables                                                                                                                                                                                                                                               | Category     |
|--------------------------------|---------------------------------------------------------------------------------------------------------------------------------------------------------------------------------------------------------------------------------------------------------|--------------|
| Prespecified subgroup analyses | • Age (years)                                                                                                                                                                                                                                           | <65<br>≥65   |
|                                | • HbA1c (%)                                                                                                                                                                                                                                             | <8.0<br>≥8.0 |
|                                | • BNP (pg/nL)                                                                                                                                                                                                                                           | <100<br>≥100 |
|                                | • eGFR (mL/min/1.73m <sup>2</sup> )                                                                                                                                                                                                                     | <60<br>≥60   |
|                                | • Thiazolidine use                                                                                                                                                                                                                                      | Yes<br>No    |
|                                | • Body weight (kg)                                                                                                                                                                                                                                      | <60<br>≥60   |
|                                | • AF/AFL                                                                                                                                                                                                                                                | Yes<br>No    |
| Exploratory analyses           | <ul style="list-style-type: none"> <li>• Blood pressure (mmHg)</li> <li>• Heart rate (bpm)</li> <li>• Waist circumference (cm)</li> <li>• Coronary risk factors</li> <li>• Other drugs</li> <li>• Lipid profile</li> <li>• Diabetes duration</li> </ul> |              |

2 HbA1C, hemoglobin A1C; BNP, brain natriuretic peptide, eGFR; estimated glomerular filtration

3 rate; AF, atrial fibrillation; AFL, atrial flutter
